# Supplementary material for: Structured crystallization for efficient all-inorganic perovskite solar cells with high phase stability
Source: Royal Society of Chemistry journal article supplement (doi:10.1039/c9ta05556h), 2019-01-01
Supplement: c9ta05556h1.pdf [file c9ta05556h1.pdf]

## Supporting Information

### **Structured-Crystallization for Efficient All-Inorganic Perovskite Solar Cells with High Phase Stability**

*Zhen Wang,<sup>a</sup> Ajay K. Baranwal,<sup>a</sup> Muhammad Akmal Kamarudin,<sup>a</sup> Yusuke Kamata,<sup>a</sup> Chi Huey Ng,<sup>a</sup> Manish Pandey,<sup>a</sup> Tingli Ma,<sup>\*a</sup> Shuzi Hayase<sup>\*a</sup>*

Department of Life Science and Systems Engineering, Kyushu Institute of Technology, 2-4  
Hibikino, Wakamatsu-ku, Kitakyushu, Fukuoka 808-0196, Japan.

E-mail: [wang-zhen@edu.life.kyutech.ac.jp](mailto:wang-zhen@edu.life.kyutech.ac.jp); [hayase@life.kyutech.ac.jp](mailto:hayase@life.kyutech.ac.jp)

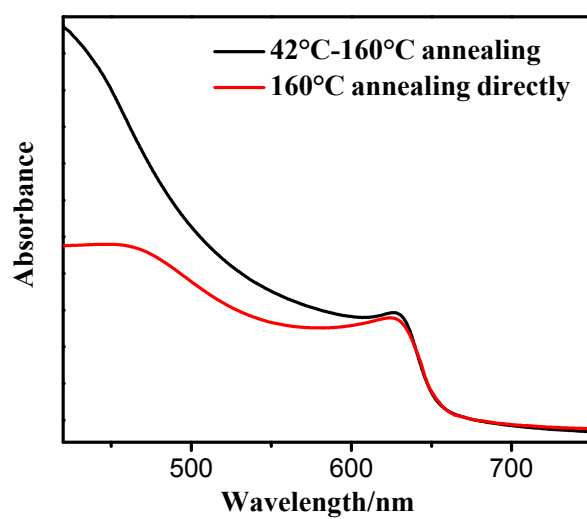

**Figure S1.** Absorbance spectra of CsPbI<sub>2</sub>Br perovskite film under different annealing process.

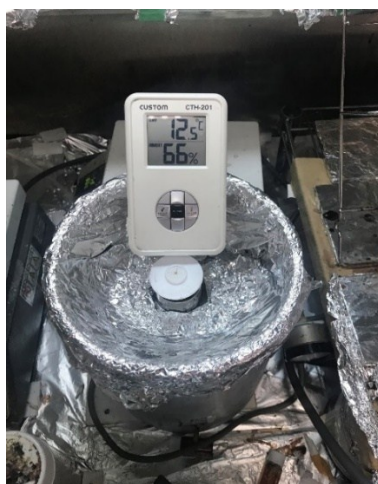

**Figure S2.** Photo of ambient air with 65% RH when all-inorganic perovskite film was prepared.

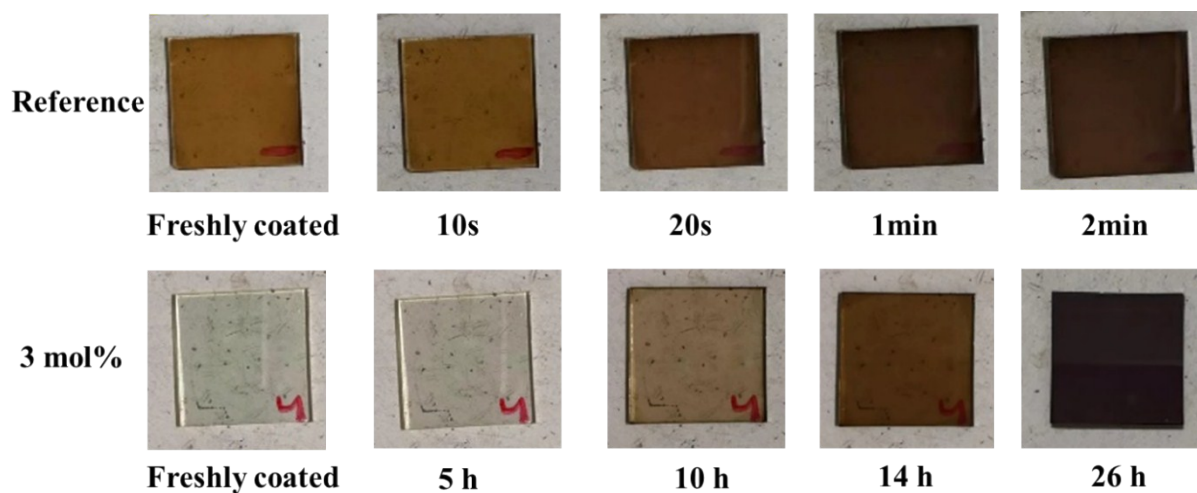

**Figure S3.** Optical images of CsPbI<sub>2</sub>Br perovskite films with and without yttrium incorporation stored under ambient atmosphere at room temperature.

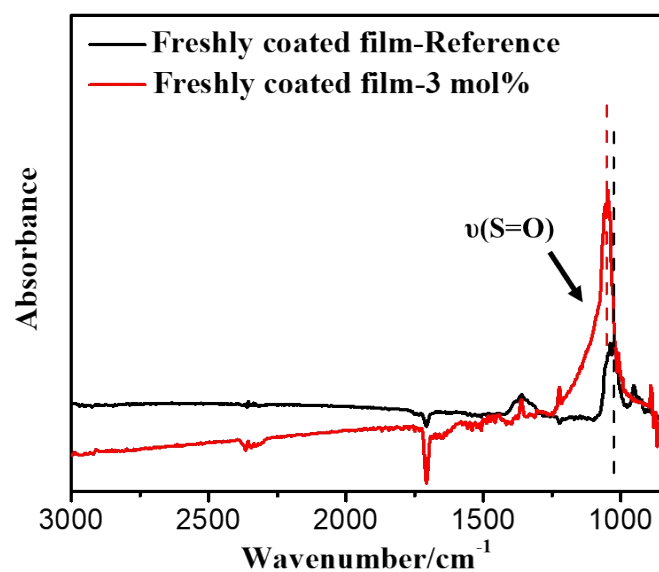

**Figure S4.** ATR-FTIR spectra of freshly coated  $\text{CsPbI}_2\text{Br}$  films with and without 3 mol% yttrium incorporation.

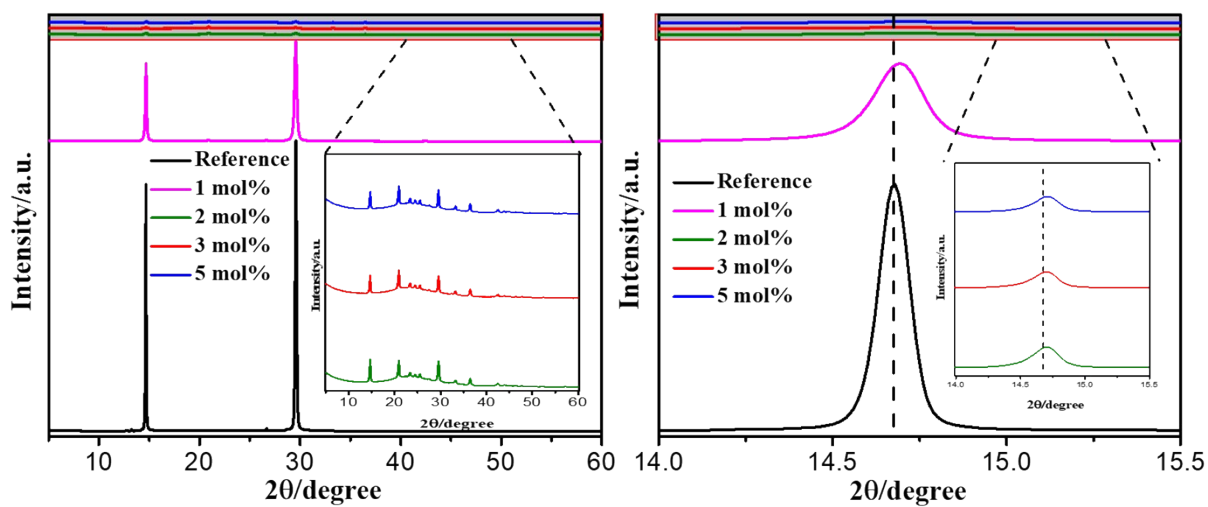

**Figure S5.** X-ray diffraction pattern and the corresponding magnification of the reference and yttrium-incorporated  $\text{CsPbI}_2\text{Br}$  perovskite films.

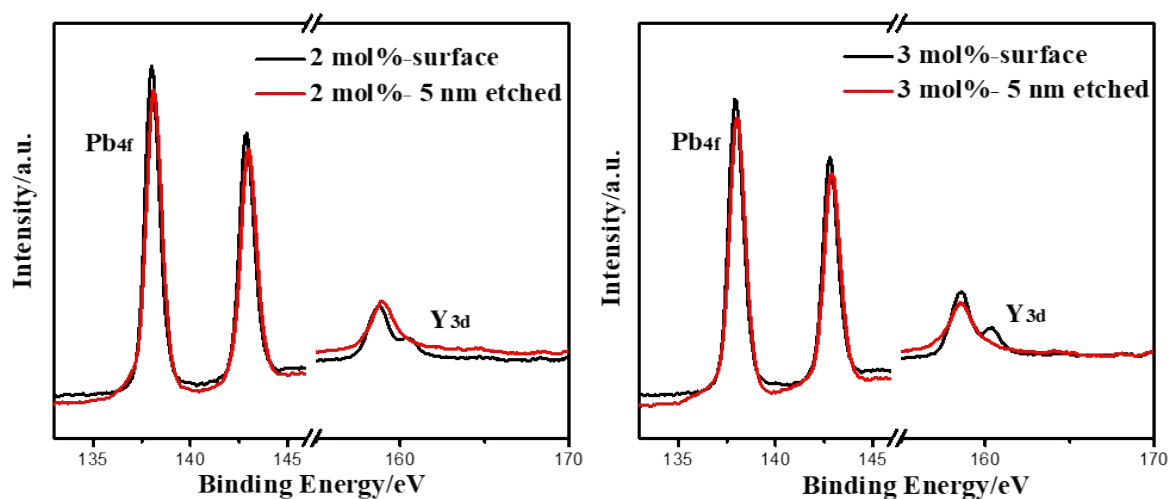

**Figure S6.** XPS spectra of Pb<sub>4f</sub> and Y<sub>3d</sub> on the surface and the depth of 5 nm by etching when 2 mol% and 3 mol% yttrium were incorporated in perovskite films.

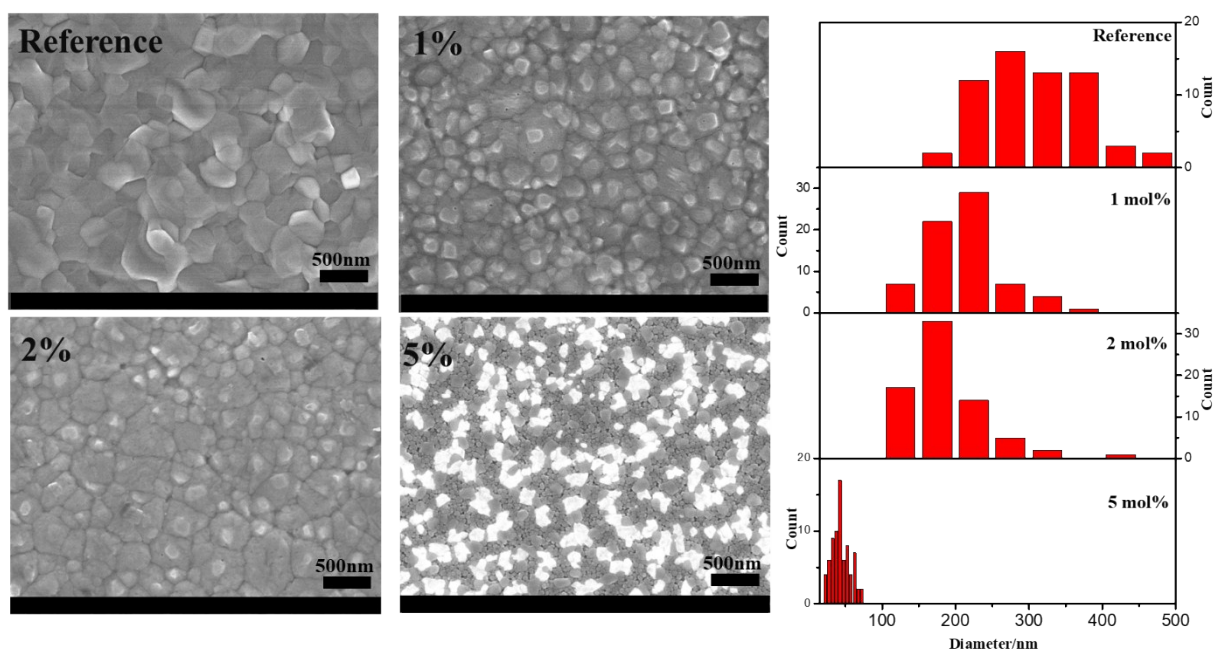

**Figure S7.** Top-view SEM images of CsPbI<sub>2</sub>Br films without and with 1 mol%, 2 mol%, 5 mol% yttrium in perovskites. The corresponding column graphs of perovskite grain size statistics are shown in right.

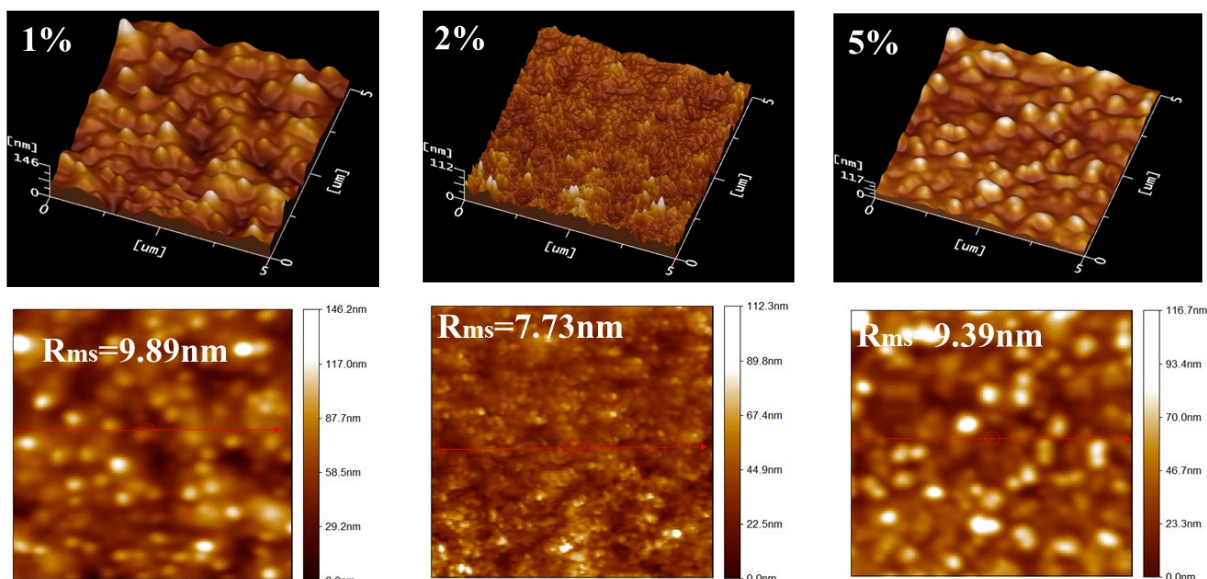

**Figure S8.** 3D AFM images of 1 mol%, 2 mol% and 5 mol% yttrium incorporated perovskite films and corresponding roughness shown below.

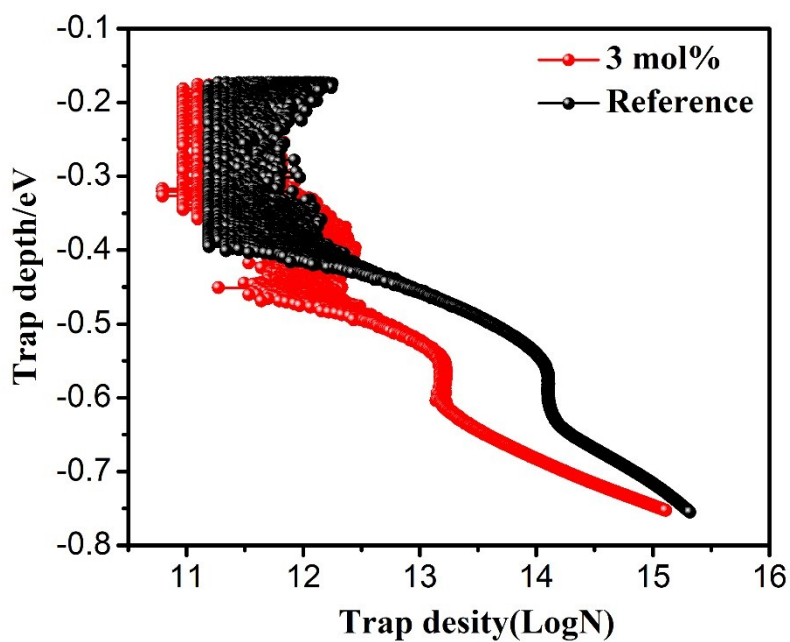

**Figure S9.** Trap depth as a function of trap density and trap density distribution in perovskite films with and without yttrium incorporation. The vacuum level of perovskite film was calculated according to the following equation.

$$E_{vac} = -KT \ln \frac{T^4}{\beta}$$

$\beta$  represents the heating rate employed in TSC measurement, T denotes the temperature and K is the Boltzmann constant.

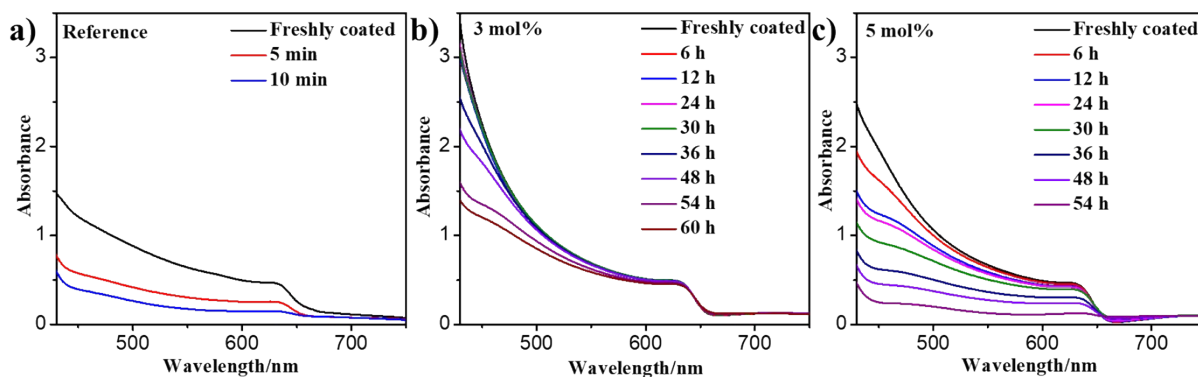

**Figure S10.** Evolution of absorbance spectra of a) reference, b) 3 mol% and c) 5 mol% yttrium-incorporated  $\text{CsPbI}_2\text{Br}$  films aging in humid air with 65% RH.

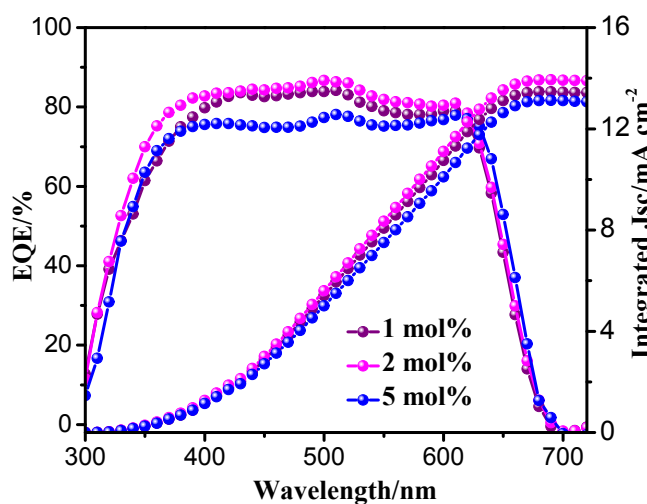

**Figure S11.** External quantum efficiency (EQE) spectra and integrated  $J_{sc}$  of 1 mol%, 2 mol% and 5 mol% yttrium-incorporated  $\text{CsPbI}_2\text{Br}$  PSCs.

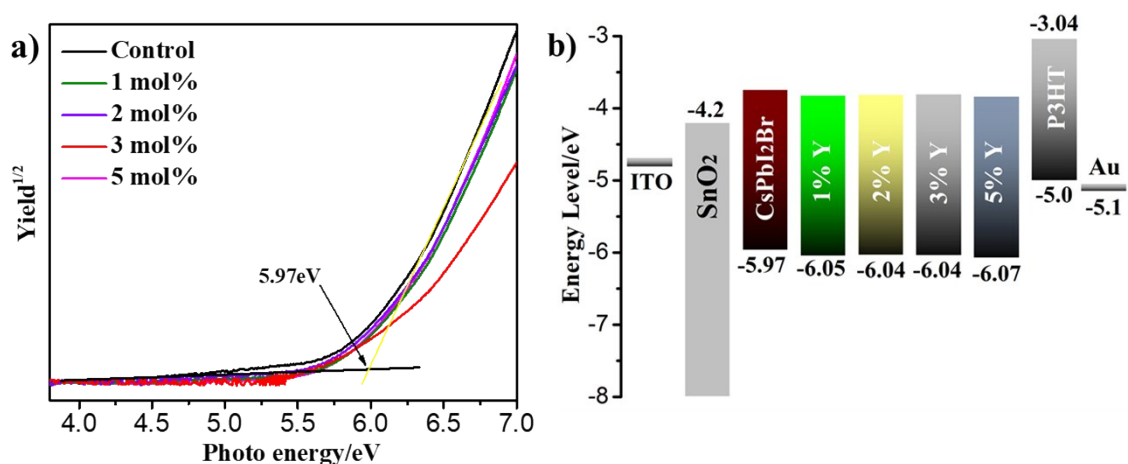

**Figure S12.** a) Photoelectron yield spectroscopy (PYS) spectra of  $\text{CsPbI}_2\text{Br}$  films with and without various amount of yttrium incorporation. b) Energy level diagram of perovskite device before and after yttrium incorporation.



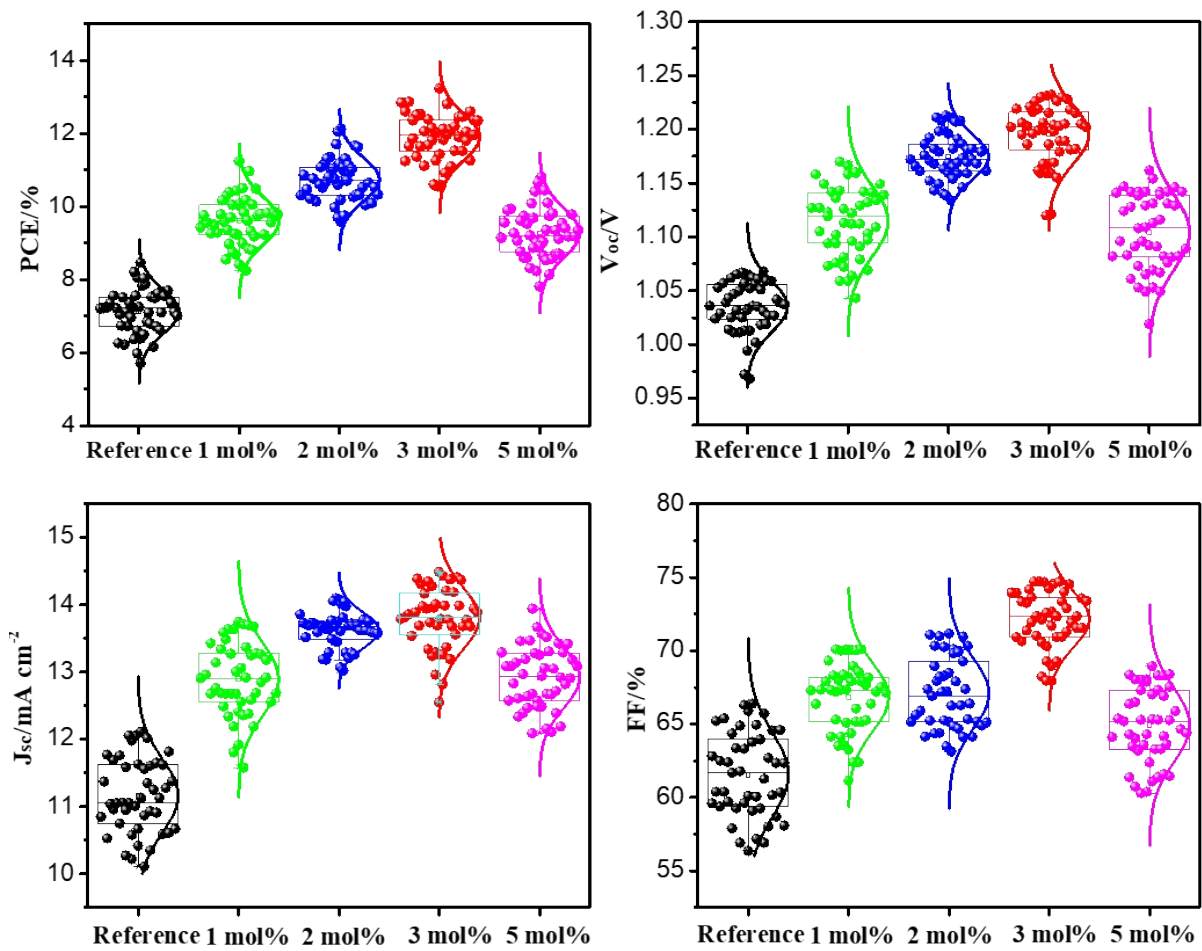

**Figure S13.** Statistics of the corresponding devices parameters including PCE,  $J_{sc}$ ,  $V_{oc}$  and FF.

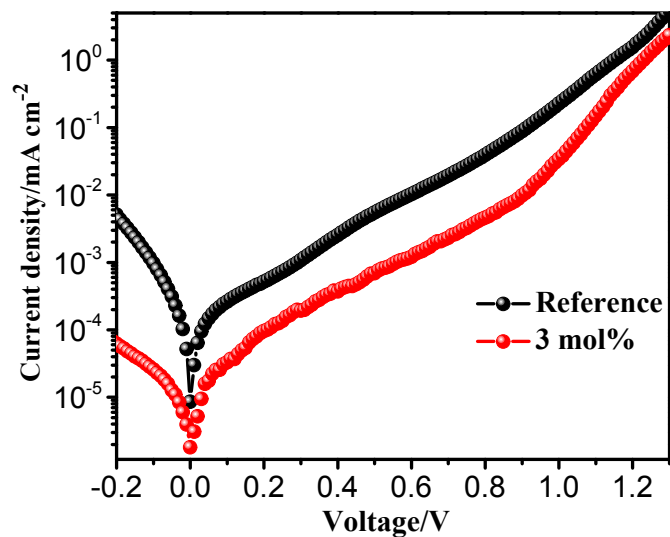

**Figure S14.** Dark J-V characteristics on a semilog scale based on CsPbI<sub>2</sub>Br PSCs with and without 3 mol% yttrium incorporation.

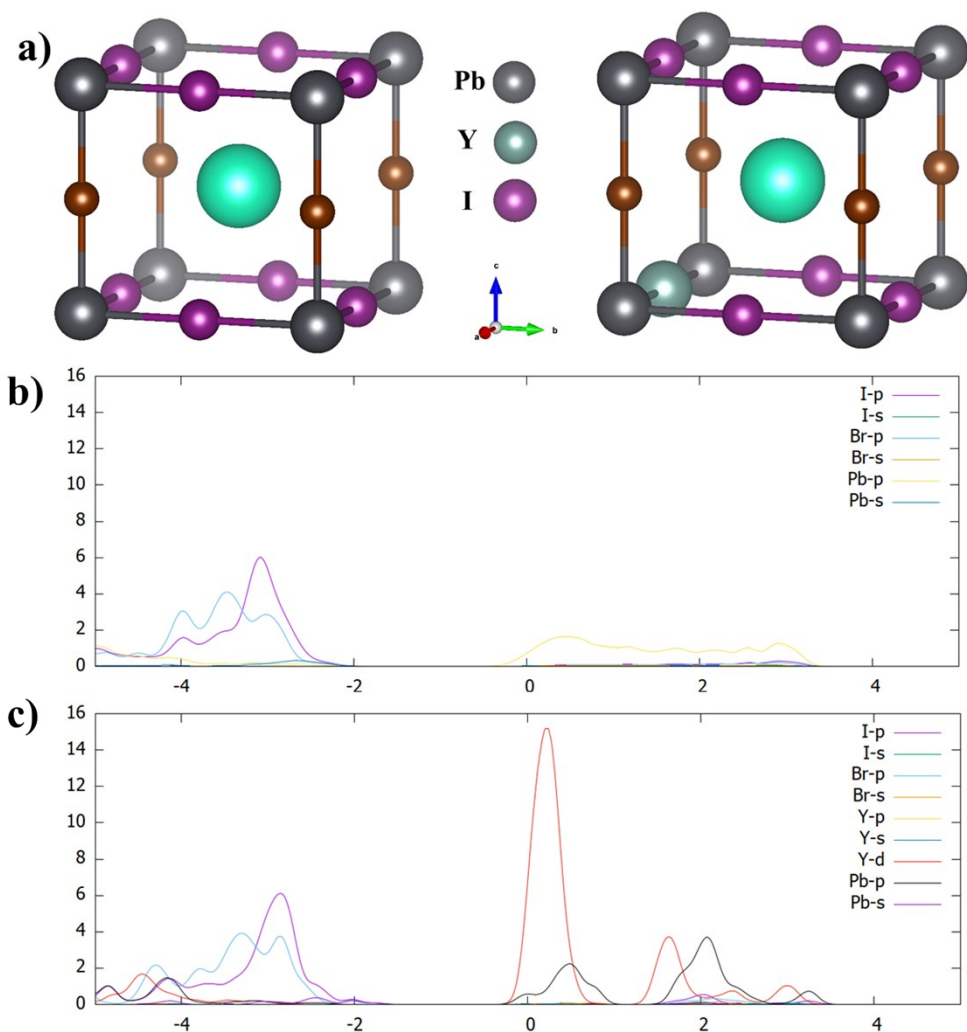

**Figure S15.** a) Geometric structures of CsPbI<sub>2</sub>Br and CsPb<sub>0.875</sub>Y<sub>0.125</sub>I<sub>2</sub>Br perovskites. Calculated DOS for b) the CsPbI<sub>2</sub>Br perovskite and c) CsPb<sub>0.875</sub>Y<sub>0.125</sub>I<sub>2</sub>Br perovskite.

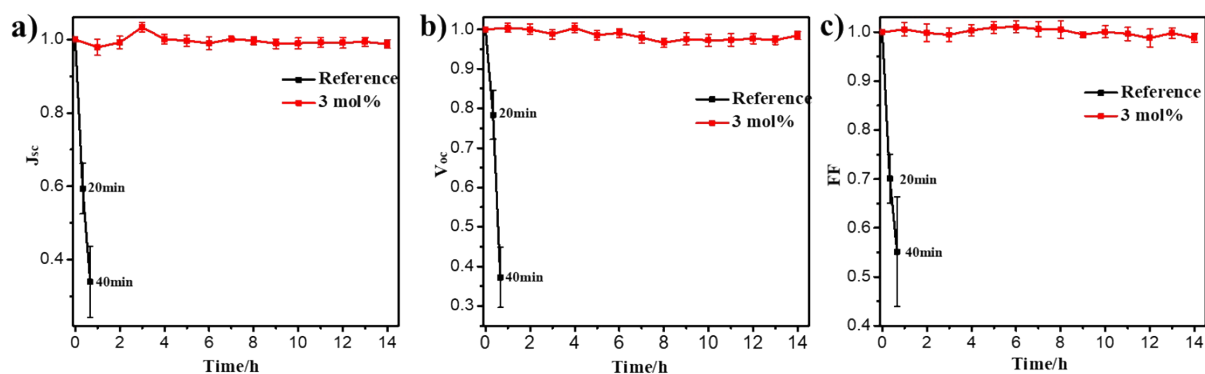

**Figure S16.** Stability tests for normalized a)  $J_{sc}$ , b)  $V_{oc}$  and c) FF of the reference and 3 mol% yttrium-incorporated CsPbI<sub>2</sub>Br PSCs without encapsulation in ambient air with 65% RH.



**Table S1.** Summary of 2 mol% and 3 mol% yttrium-incorporated CsPbI<sub>2</sub>Br chemical composition including the surface and 5 nm depth of perovskite films.

|           |   | J <sub>sc</sub> (mA cm <sup>-2</sup> ) | V <sub>oc</sub> (V) | FF (%) | PCE (%) | Hysteresis Index (%) |
|-----------|---|----------------------------------------|---------------------|--------|---------|----------------------|
| Reference | F | 12.02                                  | 1.047               | 56.07  | 7.05    | 20                   |
|           | R | 12.11                                  | 1.065               | 65.89  | 8.46    |                      |
| 3 mol%    | F | 14.44                                  | 1.234               | 74.01  | 13.19   | 4                    |
|           | R | 14.49                                  | 1.232               | 74.23  | 13.25   |                      |

**Table S2.** Parameters of the photovoltaic parameters of CsPbI<sub>2</sub>Br and CsPb<sub>0.97</sub>Y<sub>0.03</sub>I<sub>2</sub>Br PSCs at forward (F) and reverse (R) scans.

|    |         | Y <sub>3d</sub> | Pb <sub>4f</sub> | Area ratio(Y <sub>3d</sub> /Pb <sub>4f</sub> ) |
|----|---------|-----------------|------------------|------------------------------------------------|
| 2% | surface | 14169.4         | 70737.5          | 0.2                                            |
|    | etching | 13449.9         | 72456.0          | 0.19                                           |
| 3% | surface | 16129.8         | 61469.9          | 0.26                                           |
|    | etching | 13954.5         | 59647.7          | 0.23                                           |

**Table S3.** Summary of parameters fitted from TRPL spectra using the double-exponential equation.

| perovskite                                               | τ <sub>1</sub> (ns) | τ <sub>2</sub> (ns) |
|----------------------------------------------------------|---------------------|---------------------|
| CsPbI <sub>2</sub> Br                                    | 0.26                | 0.81                |
| CsPb <sub>0.97</sub> Y <sub>0.03</sub> I <sub>2</sub> Br | 3.98                | 7.85                |
